# Supplementary material
Source: bioRxiv or medRxiv preprint supplement (https://www.medrxiv.org/highwire/filestream/73613/field_highwire_adjunct_files/4/2020.03.12.20034165-5.pdf)
Supplement: Supplementary file [file 2020.03.12.20034165-5.pdf]

**Supplementary Table 5.** Primer sequences used for the RT-PCR of the in vitro model showing the effect of metformin on fibroblasts from women with POP (**Figure 2**).

| Target gene   |         | Oligonucleotide sequence     | Annealing temperature (°C) | Product Size (bp) |
|---------------|---------|------------------------------|----------------------------|-------------------|
| <b>COL1A1</b> | Forward | 5' TCCAACGAGATCGAGATCC 3'    | 56.05                      | 191               |
|               | Reverse | 5' AAGCCGAATTCCTGGTCT 3'     | 55.76                      |                   |
| <b>COL3A1</b> | Forward | 5' GATCCGTTCTCTGCGATGAC 3'   | 58.52                      | 279               |
|               | Reverse | 5' AGTTCTGAGGACCAGTAGGG 3'   | 57.76                      |                   |
| <b>ELN</b>    | Forward | 5' TTTGGCCCGGGAGTAGTTGG 3'   | 62.13                      | 136               |
|               | Reverse | 5' CAGCTGCTTCTGGTGACACAAC 3' | 62.2                       |                   |
| <b>YWHAZ</b>  | Forward | 5' GATGAAGCCATTGCTGAACCTG 3' | 58.49                      | 229               |
|               | Reverse | 5' CTATTTGTGGGACAGCATGGA 3'  | 58.00                      |                   |
| <b>HPRT1</b>  | Forward | 5' GCTGACCTGCTGGATTACAT 3'   | 57.66                      | 260               |
|               | Reverse | 5' CTTGCGACCTTGACCATCT 3'    | 57.46                      |                   |

*RT-PCR, reverse-transcription polymerase chain reaction; COL1A1,  $\alpha$ 1(I)procollagen; COL3A1,  $\alpha$ 1(III)procollagen; ELN, elastin; YWHAZ, tyrosine 3-monooxygenase /tryptophan 5-monooxygenase activation protein, zeta polypeptide; HPRT1, hypoxanthine phosphoribosyltransferase 1.*
